# Supplementary material for: Bone Health or Performance? Adaptation Response of Genetically Divergent Chicken Layer Lines to a Nutritive Calcium Depletion
Source: MDPI journal article supplement (doi:10.3390/ani10091645), 2020-09-14
Supplement: s1 [file s1]

## Supplementary Material

D1

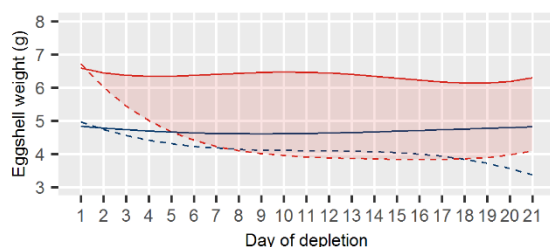

D1

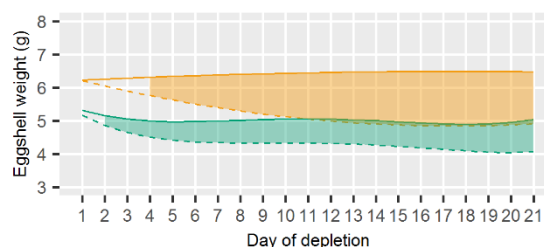

D2

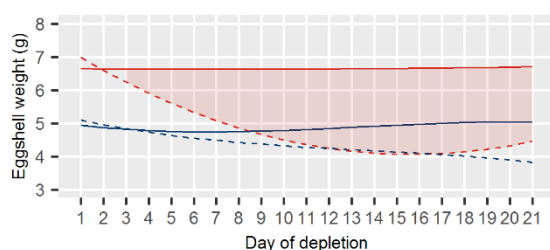

D2

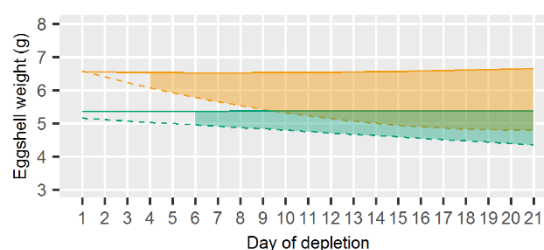

D3

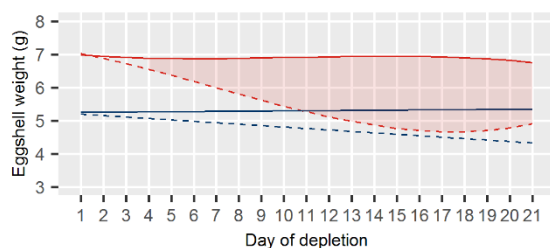

D3

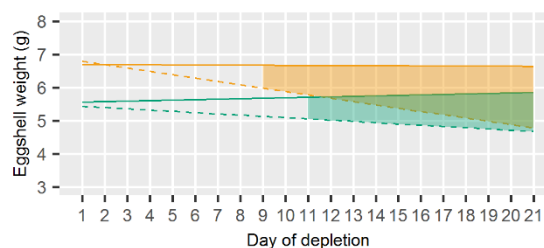

— WLA\_CON    - - WLA\_DEF    — R11\_CON    - - R11\_DEF

— BLA\_CON    - - BLA\_DEF    — L68\_CON    - - L68\_DEF

**Figure S1.** Least squares means for eggshell weight in control (CON) and calcium deficient (DEF) groups of four layer lines (WLA, R11, BLA, L68) during periods of calcium depletion (D1, D2, D3). The filled in areas indicate when both dietary groups of the lines differ significantly at  $p < 0.05$ .
