# Supplementary material for: Bone Health or Performance? Adaptation Response of Genetically Divergent Chicken Layer Lines to a Nutritive Calcium Depletion
Source: MDPI journal article supplement (doi:10.3390/ani10091645), 2020-09-14
Supplement: s1 [file s1]

## Supplementary Material

**Table S4.** Mean ( $\bar{x}$ ) daily feed consumption (g) during periods of calcium depletion (D2, D3) and recovery (R1, R2) in control (CON) and calcium deficient (DEF) groups of combinations of two layer lines each.

| Period | WLA / L68 combination |        | BLA / R11 combination |        |
|--------|-----------------------|--------|-----------------------|--------|
|        | CON                   | DEF    | CON                   | DEF    |
| D1     | 115.50                | 113.20 | 121.80                | 101.20 |
| R1     | 115.80                | 114.90 | 110.30                | 115.50 |
| D2     | 104.30                | 104.40 | 110.70                | 101.00 |
| R2     | 119.30                | 123.90 | 118.10                | 123.40 |
| D3     | 117.20                | 112.10 | 121.20                | 107.90 |
