# Supplementary material for: Bone Health or Performance? Adaptation Response of Genetically Divergent Chicken Layer Lines to a Nutritive Calcium Depletion
Source: MDPI journal article supplement (doi:10.3390/ani10091645), 2020-09-14
Supplement: s1 [file s1]

## Supplementary Material

**Table S3.** Least squares means  $\pm$  standard errors for egg quality traits during the last three consecutive days of preliminary (Pre), first (R1) and second recovery period (R2) in control (CON) and calcium deficient (DEF) groups of four layer lines (WLA, R11, BLA, L68).

| Period                                | WLA                 |                     | R11                 |                     | BLA                 |                     | L68                             |                                 |
|---------------------------------------|---------------------|---------------------|---------------------|---------------------|---------------------|---------------------|---------------------------------|---------------------------------|
|                                       | CON                 | DEF                 | CON                 | DEF                 | CON                 | DEF                 | CON                             | DEF                             |
| <b>Egg weight (g)</b>                 |                     |                     |                     |                     |                     |                     |                                 |                                 |
| Pre                                   | 59.16<br>$\pm 0.87$ | 58.19<br>$\pm 0.62$ | 46.13<br>$\pm 0.42$ | 45.91<br>$\pm 0.34$ | 58.83<br>$\pm 0.86$ | 59.83<br>$\pm 0.59$ | 47.72<br>$\pm 0.69$             | 47.62<br>$\pm 0.45$             |
| R1                                    | 60.12<br>$\pm 0.78$ | 60.65<br>$\pm 0.5$  | 49.34<br>$\pm 0.41$ | 49.18<br>$\pm 0.3$  | 61.57<br>$\pm 1.23$ | 60.36<br>$\pm 0.83$ | 52.68<br>$\pm 0.79$             | 51.47<br>$\pm 0.49$             |
| R2                                    | 59.43<br>$\pm 0.8$  | 53.68<br>$\pm 3.23$ | 51.79<br>$\pm 1.0$  | 52.48<br>$\pm 0.72$ | 62.30<br>$\pm 2.45$ | 63.00<br>$\pm 1.72$ | 51.79<br>$\pm 1.0$              | 52.48<br>$\pm 0.72$             |
| <b>Eggshell weight (g)</b>            |                     |                     |                     |                     |                     |                     |                                 |                                 |
| Pre                                   | 6.65<br>$\pm 0.12$  | 6.68<br>$\pm 0.08$  | 4.63<br>$\pm 0.08$  | 4.71<br>$\pm 0.06$  | 6.20<br>$\pm 0.13$  | 6.32<br>$\pm 0.09$  | 4.77<br>$\pm 0.17$              | 4.73<br>$\pm 0.12$              |
| R1                                    | 6.94<br>$\pm 0.16$  | 7.08<br>$\pm 0.11$  | 5.01<br>$\pm 0.07$  | 5.28<br>$\pm 0.06$  | 6.52<br>$\pm 0.14$  | 6.63<br>$\pm 0.1$   | 5.42 <sup>a</sup><br>$\pm 0.1$  | 5.14 <sup>b</sup><br>$\pm 0.06$ |
| R2                                    | 7.11<br>$\pm 0.16$  | 7.14<br>$\pm 0.11$  | 5.40<br>$\pm 0.15$  | 5.60<br>$\pm 0.11$  | 6.61<br>$\pm 0.49$  | 6.87<br>$\pm 0.35$  | 5.40<br>$\pm 0.15$              | 5.60<br>$\pm 0.11$              |
| <b>Eggshell thickness (mm)</b>        |                     |                     |                     |                     |                     |                     |                                 |                                 |
| Pre                                   | 0.39<br>$\pm 0.01$  | 0.39<br>$\pm 0.01$  | 0.32<br>$\pm 0.01$  | 0.31<br>$\pm 0.01$  | 0.36<br>$\pm 0.01$  | 0.37<br>$\pm 0.01$  | 0.32<br>$\pm 0.01$              | 0.31<br>$\pm 0.01$              |
| R1                                    | 0.39<br>$\pm 0.01$  | 0.37<br>$\pm 0.01$  | 0.32<br>$\pm 0.01$  | 0.32<br>$\pm 0.01$  | 0.36<br>$\pm 0.01$  | 0.36<br>$\pm 0.01$  | 0.33 <sup>a</sup><br>$\pm 0.01$ | 0.31 <sup>b</sup><br>$\pm 0.01$ |
| R2                                    | 0.38<br>$\pm 0.01$  | 0.39<br>$\pm 0.01$  | 0.33<br>$\pm 0.01$  | 0.33<br>$\pm 0.01$  | 0.36<br>$\pm 0.01$  | 0.37<br>$\pm 0.01$  | 0.33<br>$\pm 0.01$              | 0.33<br>$\pm 0.01$              |
| <b>Eggshell breaking strength (N)</b> |                     |                     |                     |                     |                     |                     |                                 |                                 |
| Pre                                   | 49.26<br>$\pm 1.89$ | 50.70<br>$\pm 1.35$ | 34.36<br>$\pm 1.3$  | 34.60<br>$\pm 0.98$ | 44.12<br>$\pm 1.72$ | 45.95<br>$\pm 1.15$ | 38.05<br>$\pm 2.67$             | 37.29<br>$\pm 1.85$             |
| R1                                    | 42.96<br>$\pm 2.86$ | 43.70<br>$\pm 1.91$ | 28.70<br>$\pm 1.59$ | 29.89<br>$\pm 1.26$ | 38.33<br>$\pm 1.47$ | 38.78<br>$\pm 0.99$ | 30.28<br>$\pm 2.0$              | 29.91<br>$\pm 1.26$             |
| R2                                    | 37.97<br>$\pm 2.41$ | 38.14<br>$\pm 1.73$ | 25.64<br>$\pm 3.18$ | 27.39<br>$\pm 2.27$ | 31.6<br>$\pm 2.67$  | 34.00<br>$\pm 1.86$ | 25.64<br>$\pm 3.18$             | 27.39<br>$\pm 2.27$             |

<sup>a,b</sup> Means with no common superscript differed significantly within each parameter, experimental period and layer line (Tukey's HSD-Test,  $p < 0.05$ ).
