# Supplementary material for: Bone Health or Performance? Adaptation Response of Genetically Divergent Chicken Layer Lines to a Nutritive Calcium Depletion
Source: MDPI journal article supplement (doi:10.3390/ani10091645), 2020-09-14
Supplement: s1 [file s1]

## Supplementary Material

**Table S2.** Ingredients and nutrient composition of the layer diets.

| Diet                                              | Adequate Calcium diet<br>(Ca+) | Low Calcium diet<br>(Ca-) |
|---------------------------------------------------|--------------------------------|---------------------------|
| <b>Ingredients (%)</b>                            |                                |                           |
| Wheat                                             | 39.74                          | 36.81                     |
| Wheat bran                                        | -                              | 11.00                     |
| Corn                                              | 20.00                          | 25.00                     |
| Soybean toasted                                   | 10.63                          | -                         |
| Soybean meal toasted                              | 8.00                           | 10.71                     |
| High protein soybean meal toasted                 | 5.00                           | 5.00                      |
| Lucerne pellets                                   | 2.44                           | 5.58                      |
| Soybean oil                                       | 2.00                           | 2.00                      |
| Calcium phosphate                                 | 2.46                           | 1.79                      |
| Calcium carbonate                                 | 8.15                           | 0.53                      |
| Sodium chloride                                   | 0.42                           | 0.40                      |
| DL-Methionine                                     | 0.16                           | 0.15                      |
| Lysine HCL                                        | -                              | 0.02                      |
| Premix <sup>1</sup>                               | 1.00                           | 1.00                      |
| <b>Nutrient composition (on dry matter basis)</b> |                                |                           |
| Crude protein (%) <sup>2</sup>                    | 17.10                          | 16.60                     |
| Crude fat (%) <sup>2</sup>                        | 6.40                           | 5.00                      |
| Starch (%) <sup>2</sup>                           | 38.20                          | 42.70                     |
| Sucrose (%) <sup>2</sup>                          | 3.30                           | 3.40                      |
| AMEN / kg Dry matter (MJ) <sup>3,4</sup>          | 11.60                          | 11.90                     |
| Calcium (%) <sup>2</sup>                          | 4.26                           | 1.09                      |

<sup>1</sup> Premix – hens: feed additives (per kg premix): Vitamin A, 1,000,000 IU; Vitamin D3, 250,000 IU; Vitamin E, 2,000 mg; Vitamin B1, 250 mg; Vitamin B2, 700 mg; Vitamin B6, 400 mg; Vitamin B12, 2,000 µg; Vitamin K3, 400 mg; Nicotin amide, 4,000 mg; Calcium-D-pantothenate, 1,000 mg; Folic acid, 60 mg; Biotin, 2,500 µg; Choline chloride, 40,000 mg; Fe, 4,000 mg; Cu, 1,000 mg; Mn, 10,000 mg; Zn, 8,000 mg; I, 120 mg; Se, 25 mg; Co, 20.5 mg; Butylated hydroxy toluene (BHT), 12,500 mg; Beta-carotene, 400 mg; Canthaxanthin, 400 mg; <sup>2</sup> Analyzed; <sup>3</sup> Calculated; <sup>4</sup> Apparent metabolizable energy concentrations corrected to zero nitrogen balance (AMEN), calculated according to the energy estimation equation of the World's Poultry Association (Vogt, 1986).
