# Supplementary material for: Bone Health or Performance? Adaptation Response of Genetically Divergent Chicken Layer Lines to a Nutritive Calcium Depletion
Source: MDPI journal article supplement (doi:10.3390/ani10091645), 2020-09-14
Supplement: s1 [file s1]

## Supplementary Material

**Table S1.** Light program.

| Week of age | Time    |         | Day length [h] | Light intensity [Lux] |
|-------------|---------|---------|----------------|-----------------------|
|             | Start   | End     |                |                       |
| Day 1       | -       | -       | 24.0           | 20.0                  |
| 1           | 4:00 am | 7:00 pm | 15.0           | 20.0                  |
| 2           | 4:30 am | 7:00 pm | 14.5           | 20.0                  |
| 3           | 5:30 am | 7:00 pm | 13.5           | 20.0                  |
| 4           | 6:00 am | 7:00 pm | 13.0           | 20.0                  |
| 5           | 7:00 am | 7:00 pm | 12.0           | 20.0                  |
| 6           | 7:00 am | 6:00 pm | 11.0           | 10.0                  |
| 7           | 7:00 am | 5:00 pm | 10.0           | 10.0                  |
| 8           | 7:30 am | 4:30 pm | 9.0            | 10.0                  |
| 9           | 7:30 am | 3:30 pm | 8.0            | 10.0                  |
| 10          | 7:30 am | 3:30 pm | 8.0            | 10.0                  |
| 11          | 7:30 am | 3:30 pm | 8.0            | 10.0                  |
| 12          | 7:30 am | 3:30 pm | 8.0            | 10.0                  |
| 13          | 7:30 am | 3:30 pm | 8.0            | 10.0                  |
| 14          | 7:30 am | 3:30 pm | 8.0            | 10.0                  |
| 15          | 7:30 am | 3:30 pm | 8.0            | 10.0                  |
| 16          | 7:30 am | 3:30 pm | 8.0            | 10.0                  |
| 17          | 7:00 am | 3:30 pm | 8.5            | 10.0                  |
| 18          | 6:30 am | 3:30 pm | 9.0            | 10.0                  |
| 19          | 6:30 am | 4:00 pm | 9.5            | 10.0                  |
| 20          | 5:30 am | 4:00 pm | 10.5           | 10.0                  |
| 21          | 4:30 am | 4:00 pm | 11.5           | 10.0                  |
| 22          | 4:00 am | 4:30 pm | 12.5           | 10.0                  |
| 23          | 3:30 am | 5:00 pm | 13.5           | 10.0                  |
| 24 - 52     | 3:30 am | 5:30 pm | 14.0           | 10.0                  |
